# Supplementary material for: Enhanced formaldehyde sensing properties of SnO2 nanorods coupled with Zn2SnO4
Source: Royal Society of Chemistry journal article supplement (doi:10.1039/c5ra01887k), 2015-01-01
Supplement: c5ra01887k1.pdf [file c5ra01887k1.pdf]

Electronic Supplementary Information (ESI) for RSC Advances.

This journal is © The Royal Society of Chemistry 2015

## **Enhanced formaldehyde sensing properties of SnO<sub>2</sub> nanorods coupled with Zn<sub>2</sub>SnO<sub>4</sub>**

Xuechun Xiao <sup>a</sup>, Xinxin Xing <sup>a</sup>, Bingqian Han <sup>a</sup>, Dongyang Deng <sup>a</sup>, Xiaoyan Cai <sup>a</sup>, Yude Wang <sup>a,b,\*</sup>

*a Department of Materials Science and Engineering, Yunnan University, 650091 Kunming, People's Republic of China*

*b Yunnan Province Key Lab of Mico-Nano Materials and Technology, Yunnan University, 650091 Kunming, People's Republic of China*

E-mail: ydwang@ynu.edu.cn

\* Corresponding Author, Fax: +86-871-65153832; Tel: +86-871-65031124; E-mail: ydwang@ynu.edu.cn (Y.D. Wang)

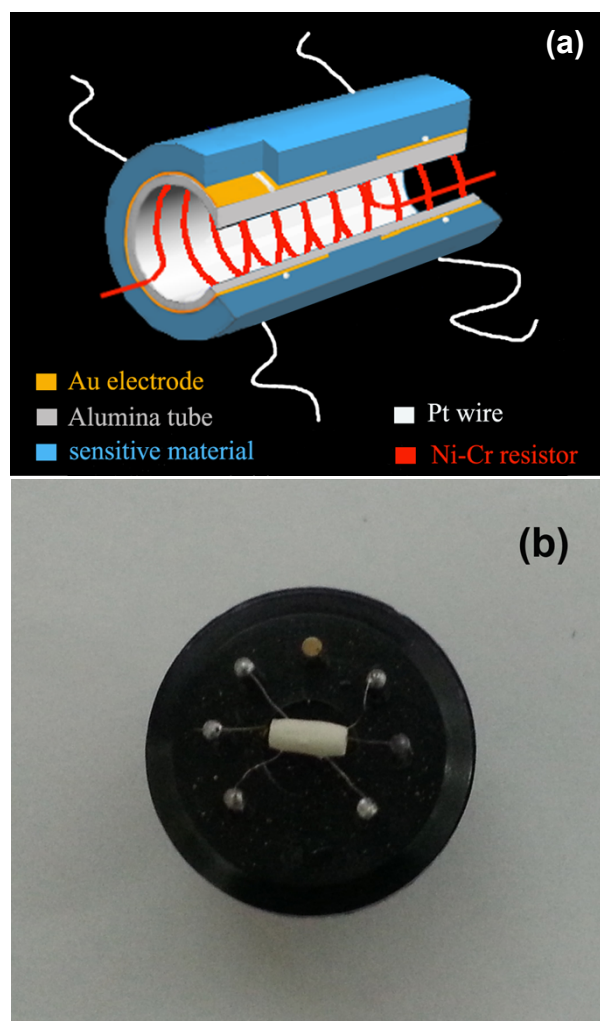

**Figure S1.**

(a) Sketch of the structure of a typical  $\text{SnO}_2\text{-Zn}_2\text{SnO}_4$  nanocomposites gas sensor;

(b) Photograph of the gas sensor.

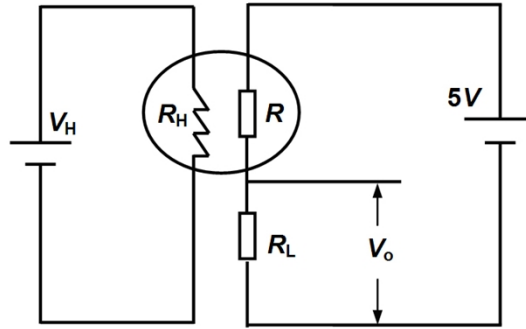

**Figure S2.** Schematic diagram of testing principle for SnO<sub>2</sub>-Zn<sub>2</sub>SnO<sub>4</sub> nanocomposites gas sensors.  $V_H$  is heating voltage and  $R_H$  is heating resistance.

According to [Figure S2](#), the electrical resistance of sensor can be obtained as following:

$$R = \frac{5 - V_o}{V_o} \cdot R_L$$

where  $R$  is the resistance of the sensor,  $R_L$  is a constant load resistance unchanged with the surrounding gas partial pressure,  $V_o$  is the sensor export voltage. The gas response  $\beta$  was defined as the ratio of the electrical resistance in air ( $R_o$ ) to that in gases ( $R_g$ ):

$$R_o = \frac{5 - (V_o)_{\text{air}}}{(V_o)_{\text{air}}} \cdot R_L, \quad R_g = \frac{5 - (V_o)_g}{(V_o)_g} \cdot R_L, \quad \beta = \frac{R_o}{R_g}$$

where  $(V_o)_{\text{air}}$  is the export voltage in air, and  $(V_o)_{\text{gas}}$  is in gases.

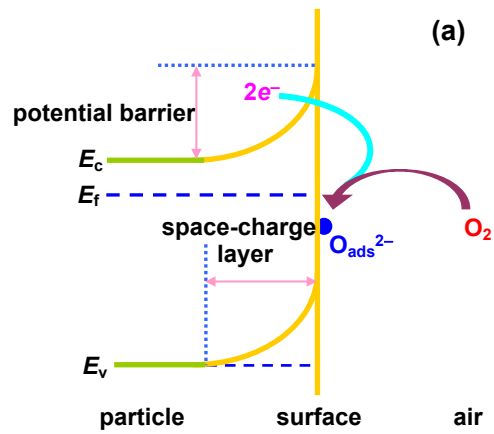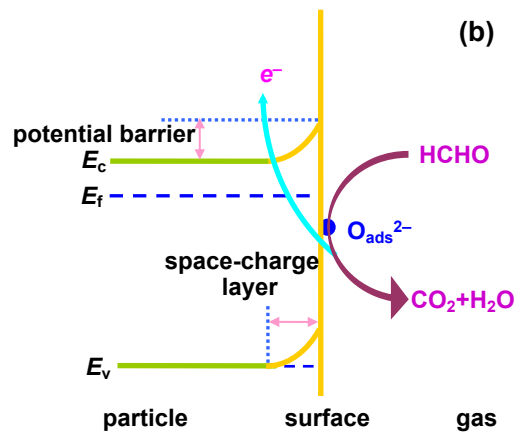

### Scheme S3.

A schematic diagram of the proposed reaction mechanism of  $SnO_2-Zn_2SnO_4$  nanocomposites based sensor to formaldehyde. (a) in air, (b) in formaldehyde.

**Table S1** The lattice constants and average grain size of SnO<sub>2</sub> and SnZn<sub>x</sub> composites.

| Samples            | SnO <sub>2</sub> |              | Zn <sub>2</sub> SnO <sub>4</sub> | Average grain size <sup>§</sup><br>(nm) |
|--------------------|------------------|--------------|----------------------------------|-----------------------------------------|
|                    | <i>a</i> (Å)     | <i>c</i> (Å) | <i>a</i> (Å)                     |                                         |
| SnO <sub>2</sub>   | 4.740            | 3.184        | –                                | 36.4                                    |
| SnZn <sub>5</sub>  | 4.745            | 3.186        | –                                | 34.2                                    |
| SnZn <sub>15</sub> | 4.758            | 3.191        | 8.618                            | 16.2                                    |
| SnZn <sub>25</sub> | 4.759            | 3.193        | 8.610                            | 10.7                                    |
| SnZn <sub>35</sub> | 4.765            | 3.197        | 8.607                            | 9.2                                     |
| SnZn <sub>45</sub> | 4.767            | 3.201        | 8.601                            | 11.1                                    |

SnO<sub>2</sub> The average lattice constant was calculated from (110), (101), (200), (111), (211), and (220) reflections. JCPDS 41-1445, System: Tetragonal, Lattice: Body-centered, Space group: *P42/mnm*(136), *a* = 4.738 Å, *c* = 3.187 Å.

Zn<sub>2</sub>SnO<sub>4</sub> The average lattice constant was calculated from (311) and (440) reflections. JCPDS 24-1470, System: Cubic, Space group: *Fd $\bar{3}m$* (227), *a* = 8.657 Å.

<sup>§</sup> The crystallite size *D* is deduced from the (101) peak width using Scherrer's equation.
